# Supplementary material for: A low-temperature self-flux route to prepare hexagonal rare earth fluorides and manipulation of upconversion luminescence in rodlike NaYbF4:Tm3+/Fe3+ crystals
Source: Royal Society of Chemistry journal article supplement (doi:10.1039/d3ce01159c), 2024-01-01

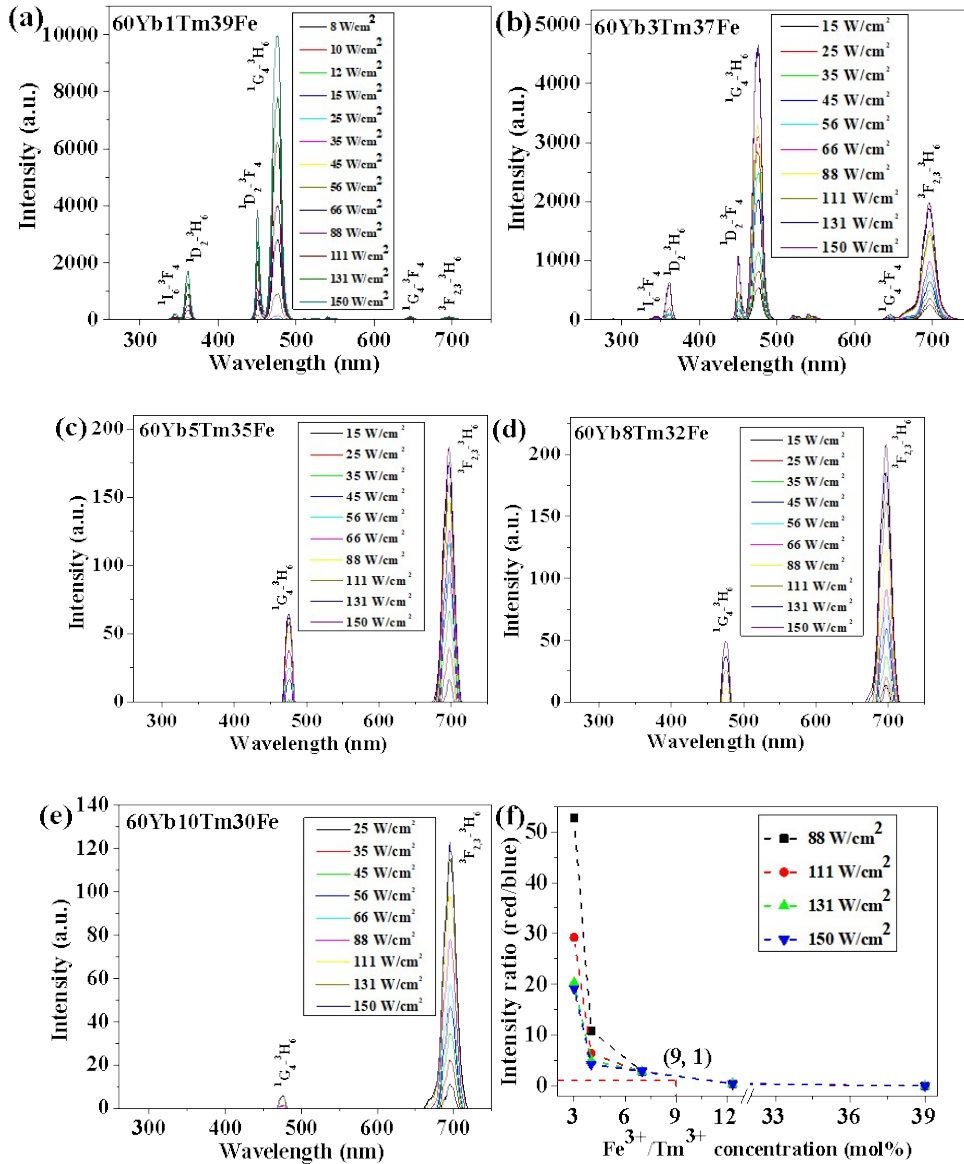

图 5-8 不同激发功率密度下高掺  $\text{Fe}^{3+}$  (30 mol% ~ 39 mol%) 的  $\text{NaYbF}_4:\text{Tm}^{3+}$  纳米材料的表征：(a-e) 激发波长为 980 nm 的室温上转换发射光谱图，(f) 696 nm ( $^3\text{F}_{2,3} \rightarrow ^3\text{H}_6$ ) 处红色发射及 476 nm ( $^1\text{G}_4 \rightarrow ^3\text{H}_6$ ) 处蓝色发射的相对强度比与样品中  $\text{Fe}^{3+}/\text{Tm}^{3+}$  相对含量的函数关系图。

The luminescence spectra of nanoparticles were measured by the home-built luminescence spectroscopy system equipped with a pulsed magnetic field. The 975 nm laser was employed as the excitation source and coupled into a fiber to pump the nanoparticles. The nanoparticles were put at the center of the pulsed magnetic field generated by a resistive coil magnet. Luminescence spectra were collected by the same fiber system with the emitted photons transmitted to the detection part and detected by a spectrometer, which is equipped with an electron multiplying charge coupled device (CCD) detector.

The magnetically induced lowering of the accepting level caused by the Zeeman splitting results in a better match with the excitation energy. Thus, the rate of excited state absorption of the activator ion is enhanced in the presence of the magnetic field. This mechanism has been invoked to explain the increased upconversion intensity of the red emission

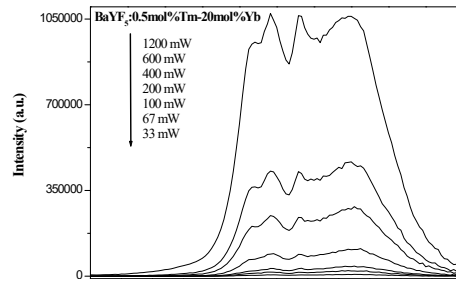

Supplement: d3ce01159c1.pdf [file d3ce01159c1.pdf]
